# Supplementary material for: Genetic and Epigenetic Variations of HPV52 in Cervical Precancer
Source: MDPI journal article supplement (doi:10.3390/ijms22126463), 2021-06-16
Supplement: s1 [file s1]

## Supplementary Data

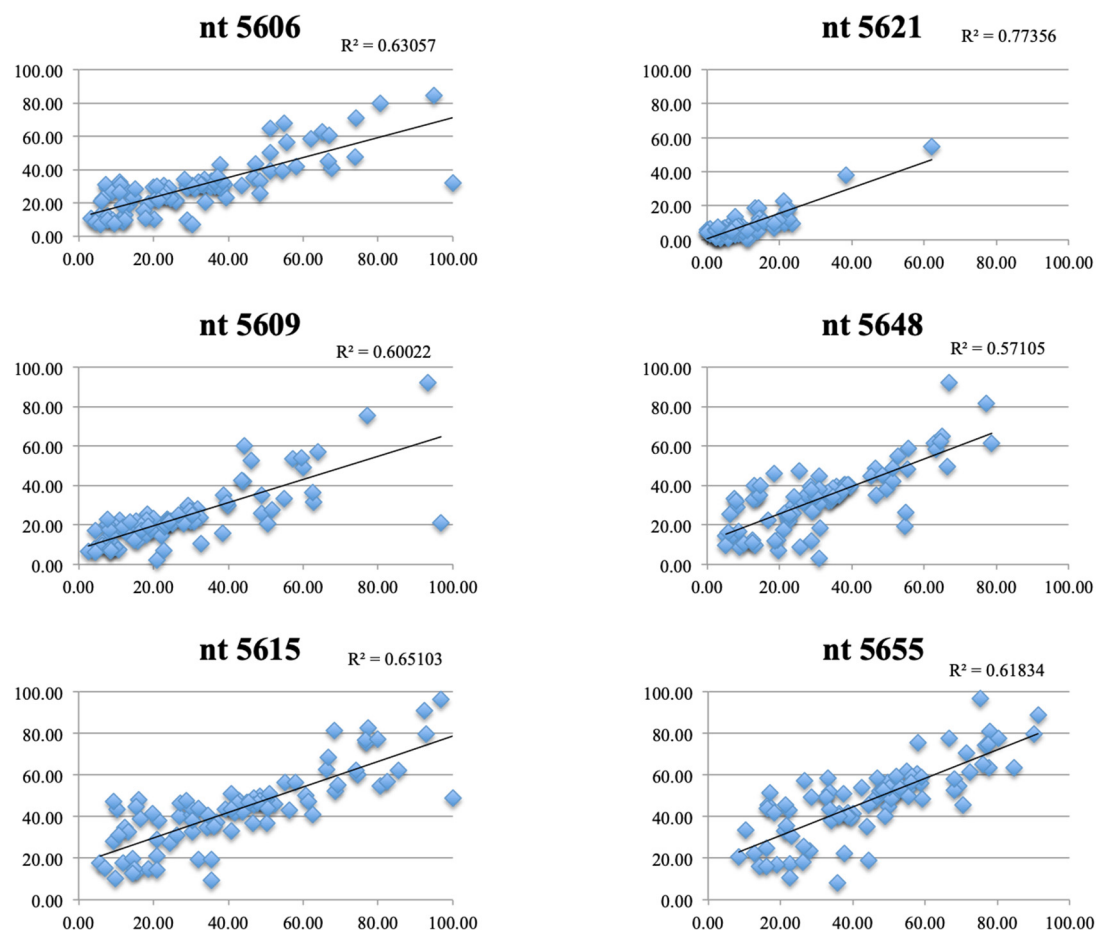

**Supplemental Figure S1. Correlation between next-generation sequencing and pyrosequencing for 6 CpG sites within the L1 region.** The x-axis shows percentage methylation obtained by pyrosequencing, and the y-axis shows percentage methylation obtained by next-generation sequencing. The figure was created using Microsoft Excel 2008.
